# Supplementary material for: Unmanned aircraft systems as a new source of disturbance for wildlife: A systematic review
Source: PubMed Central journal article supplement (PMC5479521; doi:10.1371/journal.pone.0178448), 2017-06-21

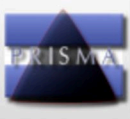

# PRISMA 2009 Flow Diagram

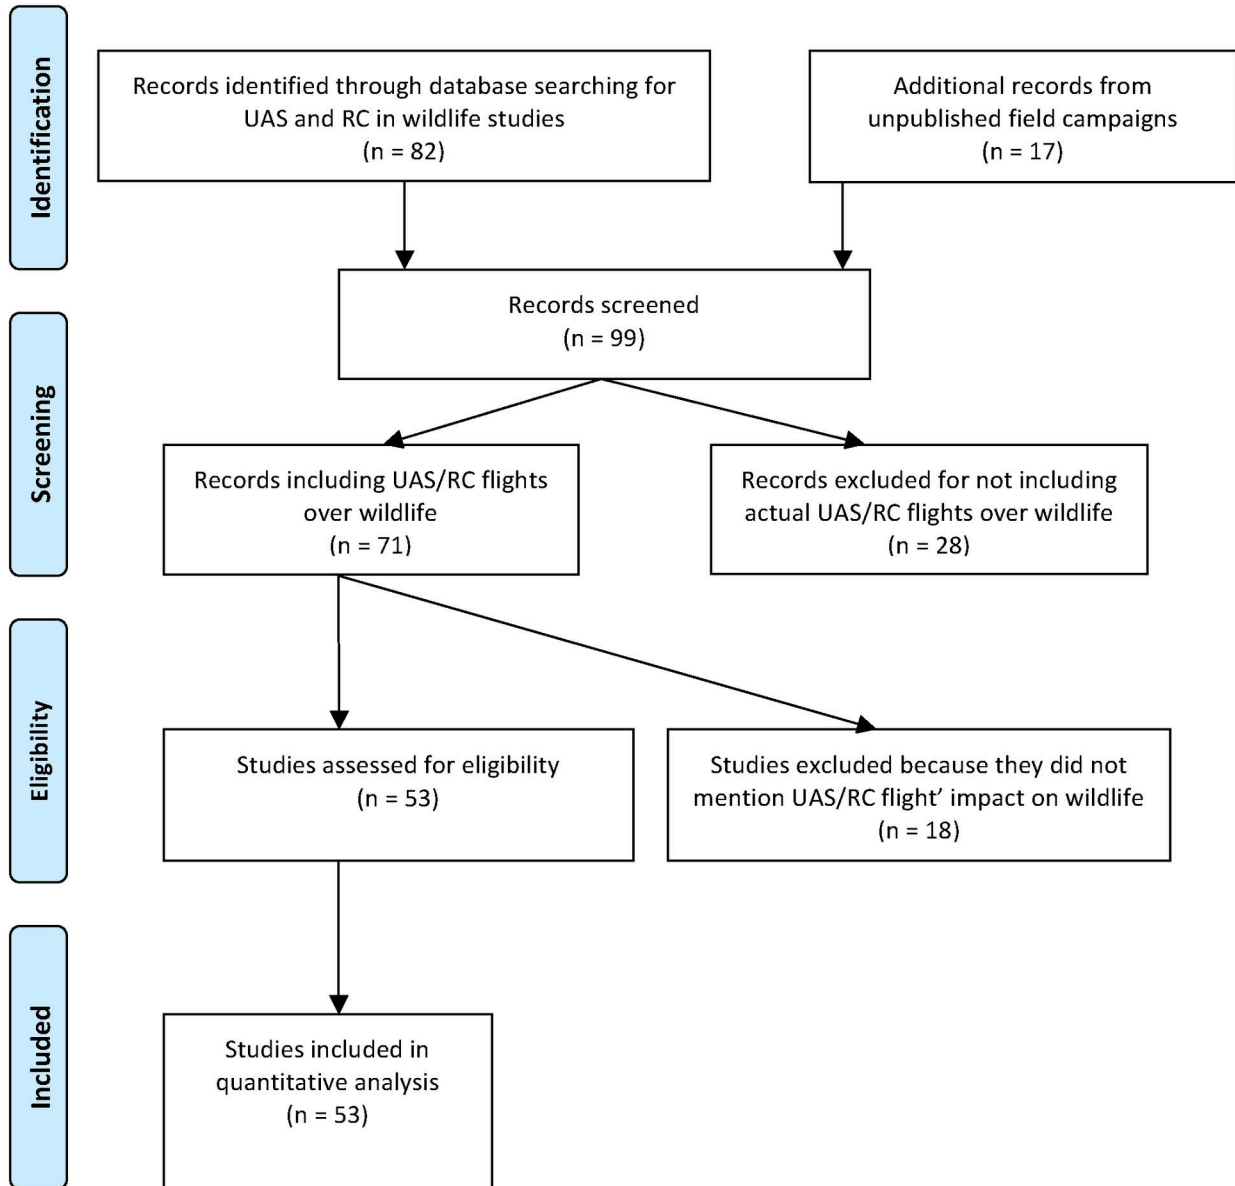

Supplement: pone.0178448.s008.pdf [file pone.0178448.s008.pdf]
